# Supplementary material for: Molecular and electronic ground and excited structures of heteroleptic ruthenium polypyridyl dyes for nanocrystalline TiO2 solar cells
Source: Royal Society of Chemistry journal article supplement (doi:10.1039/b511986c), 2006-01-01
Supplement: b511986c_figs.pdf [file b511986c_figs.pdf]

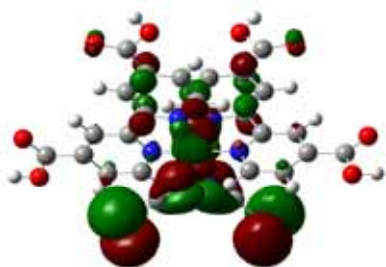

HOMO

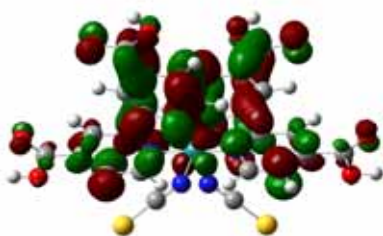

LUMO

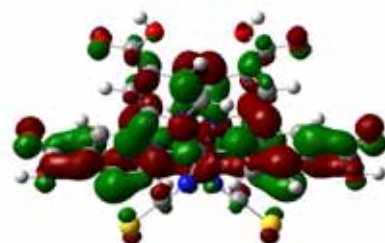

LUMO+1

Fig. 1S. Molecular orbitals of **N3** (dft/b3lyp/cep-4g, isodensity value = 0.02).

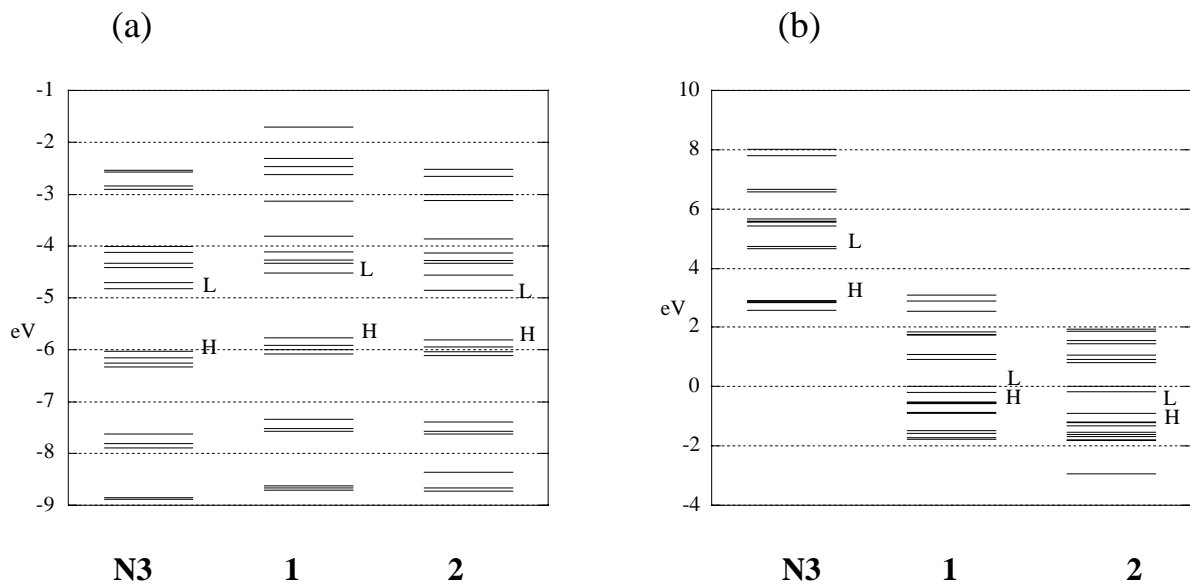

Fig. 2S. Energy levels (eV) of **N3**, **1**, and **2** (a) and deprotonated **N3**, **1**, and **2** in vacuo (b) Abbreviations: L, LUMO; H, HOMO.

(a) **N3** in vacuo

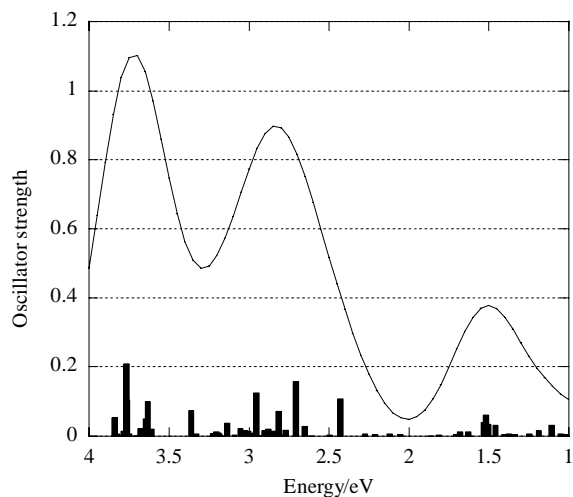

(b) **N3** in  $\text{CH}_3\text{CN}$

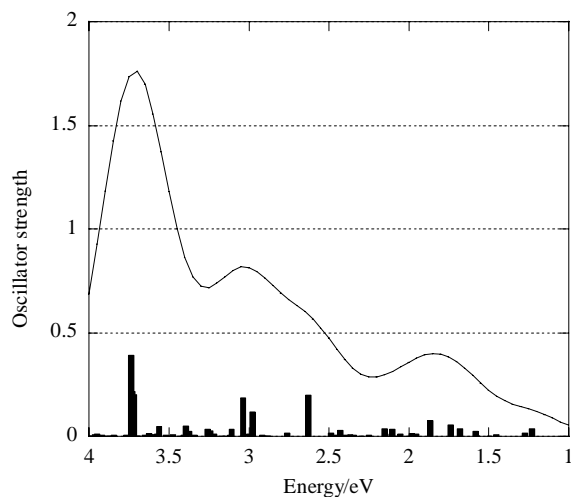

(c) Deprotonated **N3** in vacuo

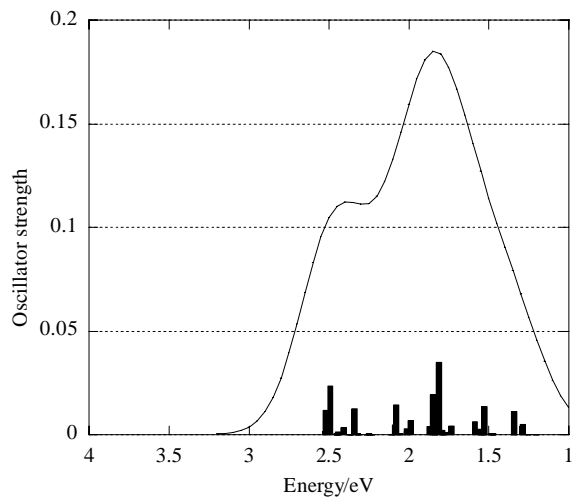

Fig. 3S. Calculated electronic spectra of **N3**: (a) **N3** in vacuo, (b) **N3** in  $\text{CH}_3\text{CN}$ , (c) deprotonated **N3** in vacuo. Vertical lines correspond to calculated excitation energies and oscillator strengths. The calculated spectra have been obtained by a gaussian convolution with  $\sigma=0.20$  and  $0.1\text{eV}$  for the transitions below and above  $4.0\text{ eV}$ , respectively.

(a) **1** in vacuo

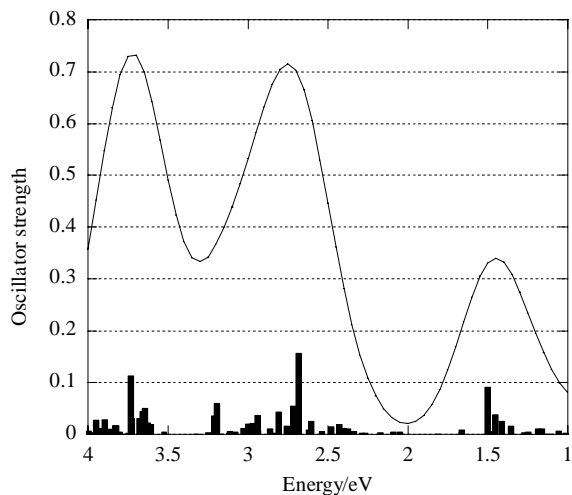

(b) **1** in CH<sub>3</sub>CN

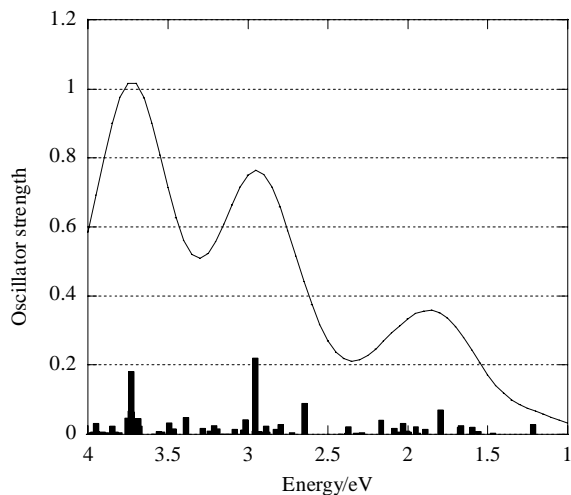

(c) Deprotonated **1** in vacuo

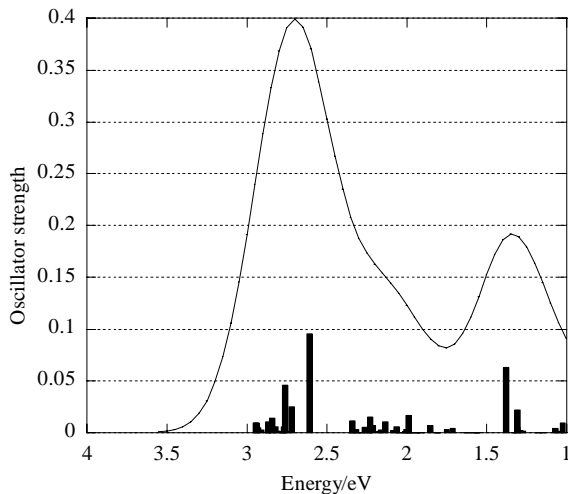

Fig. 4S. Calculated electronic spectra of **1**: (a) **1** in vacuo, (b) **1** in CH<sub>3</sub>CN, (c) deprotonated **1** in vacuo. Vertical lines correspond to calculated excitation energies and oscillator strengths. The calculated spectra have been obtained by a gaussian convolution with  $\sigma=0.20$  and 0.1eV for the transitions below and above 4.0 eV, respectively.

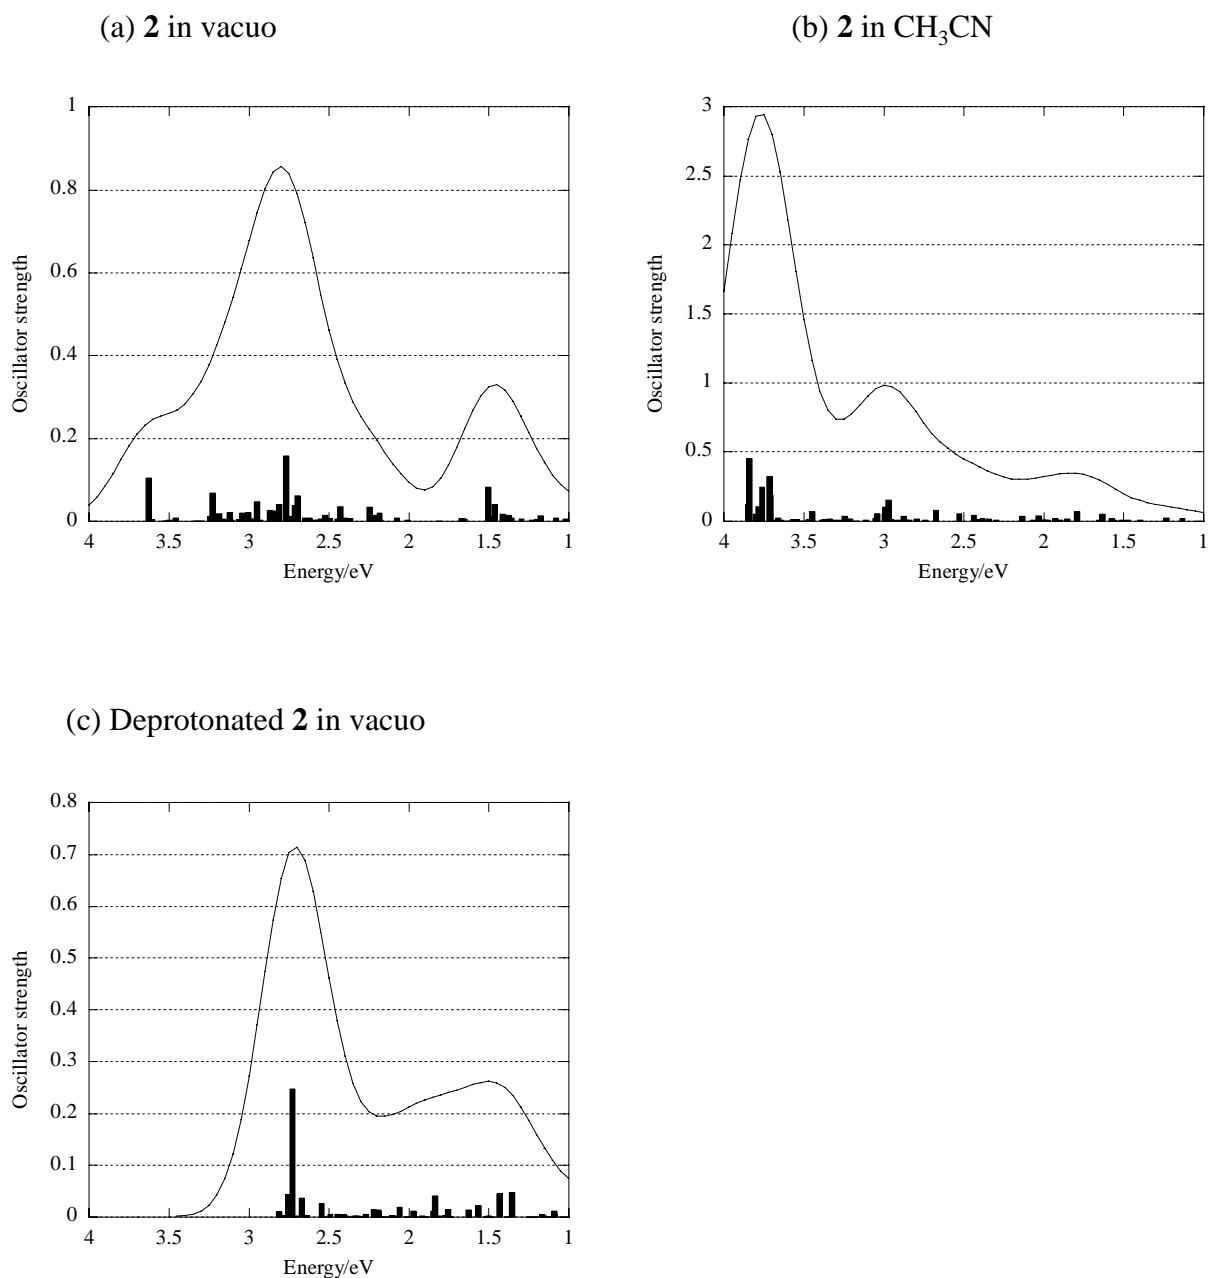

Fig. 5S. Calculated electronic spectra of **2**: (a) **2** in vacuo, (b) **2** in CH<sub>3</sub>CN, (c) deprotonated **2** in vacuo. Vertical lines correspond to calculated excitation energies and oscillator strengths. The calculated spectra have been obtained by a gaussian convolution with  $\sigma=0.20$  and  $0.1\text{eV}$  for the transitions below and above  $4.0\text{eV}$ , respectively.
