# Supplementary material for: Molecular and electronic ground and excited structures of heteroleptic ruthenium polypyridyl dyes for nanocrystalline TiO2 solar cells
Source: Royal Society of Chemistry journal article supplement (doi:10.1039/b511986c), 2006-01-01
Supplement: b511986c_tables.pdf [file b511986c_tables.pdf]

### Supplementary information data

Table 1S Energies of frontier molecular orbitals obtained from b3lyp/cep-4g wavefunction for sensitizers.

| MO <sup>a</sup> | Type <sup>b</sup>   | N3          |                       | Deprotonated-N3   |          |                       |
|-----------------|---------------------|-------------|-----------------------|-------------------|----------|-----------------------|
|                 |                     | Energy (eV) |                       | Energy (eV)       |          |                       |
|                 |                     | In vacuo    | In CH <sub>3</sub> CN | Type <sup>b</sup> | In vacuo | In CH <sub>3</sub> CN |
| 118 (V)         | bpy( $\pi^*$ )      | -4.12       | -3.87                 | bpy( $\pi^*$ )    | 5.58     | -2.56                 |
| 117 (V)         | bpy( $\pi^*$ )      | -4.32       | -4.10                 | bpy( $\pi^*$ )    | 5.54     | -2.58                 |
| 116 (V)         | bpy( $\pi^*$ )      | -4.42       | -4.18                 | bpy( $\pi^*$ )    | 5.43     | -2.70                 |
| 115 (V)         | bpy( $\pi^*$ )      | -4.70       | -4.53                 | bpy( $\pi^*$ )    | 4.74     | -3.37                 |
| <b>114 (V)</b>  | bpy( $\pi^*$ )      | -4.82       | -4.61                 | bpy( $\pi^*$ )    | 4.67     | -3.44                 |
| <b>113 (O)</b>  | Ru(d <sup>*</sup> ) | -6.03       | -6.38                 | COO <sup>-</sup>  | 2.90     | -5.64                 |
| 112 (O)         | Ru(d <sup>*</sup> ) | -6.15       | -6.65                 | COO <sup>-</sup>  | 2.90     | -5.64                 |
| 111 (O)         | NCS                 | -6.25       | -6.67                 | COO <sup>-</sup>  | 2.90     | -5.64                 |
| 110 (O)         | Ru(d <sup>*</sup> ) | -6.33       | -6.73                 | COO <sup>-</sup>  | 2.90     | -5.64                 |
| 109 (O)         | Ru(d <sup>*</sup> ) | -7.63       | -7.71                 | COO <sup>-</sup>  | 2.85     | -5.67                 |

<sup>a</sup>O: occupied; V: virtual. Bold characters are used for the HOMO (**113**) and the LUMO (**114**).

<sup>b</sup>Dominant moiety contributing to molecular orbital.

Table 2S. Selected calculated excited states for **N3** in vacuo

| State | $E$ (eV) <sup>a</sup> | $f$ <sup>b</sup> | $\phi_o$ | $\phi_v$ <sup>c</sup> | Character <sup>d</sup> |
|-------|-----------------------|------------------|----------|-----------------------|------------------------|
| 8     | 1.1069                | 0.0317           | 112      | 115                   | MLCT1                  |
| 14    | 1.4581                | 0.0306           | 113      | 117                   | MLCT1                  |
|       |                       |                  | 113      | 119                   | MLCT1                  |
| 16    | 1.5029                | 0.0356           | 112      | 117                   | MLCT1                  |
| 17    | 1.5164                | 0.0601           | 112      | 118                   | MLCT1                  |
|       |                       |                  | 113      | 117                   | MLCT1                  |
| 18    | 1.5330                | 0.0390           | 110      | 117                   | MLCT1                  |
| 29    | 2.4302                | 0.1079           | 107      | 114                   | MLCT1                  |
| 32    | 2.6547                | 0.0275           | 113      | 121                   | MLCT1                  |
| 33    | 2.7102                | 0.1578           | 109      | 116                   | MLCT1                  |
| 37    | 2.8165                | 0.0708           | 108      | 117                   | MLCT1                  |
| 44    | 2.9536                | 0.1266           | 109      | 118                   | MLCT1                  |
| 52    | 3.0545                | 0.0207           | 109      | 119                   | MLCT1                  |
| 54    | 3.1364                | 0.0368           | 107      | 118                   | MLCT1                  |
| 64    | 3.3631                | 0.0733           | 107      | 119                   | MLCT1                  |
| 66    | 3.6345                | 0.1002           | 111      | 124                   | MBCT                   |
| 67    | 3.6459                | 0.0511           | 101      | 114                   | LBCT                   |
| 69    | 3.6796                | 0.0204           | 113      | 126                   | MLCT1                  |
| 74    | 3.7649                | 0.1052           | 101      | 115                   | LBCT                   |
| 75    | 3.7689                | 0.2091           | 102      | 115                   | LBCT                   |
| 80    | 3.8414                | 0.0518           | 112      | 127                   | MBCT                   |

<sup>a</sup>Energy above the ground state (vertical excitation). <sup>b</sup>Oscillator strength. <sup>c</sup>Occupied ( $\phi_o$ ) to virtual ( $\phi_v$ ) orbital excitation. <sup>d</sup>Character of excited state: metal-to-ligand (dcppy) charge transfer (MLCT1), metal-to-ligand (phen) charge transfer (MLCT2), metal-to-ligand (dppz) charge transfer (MLCT3), ligand-based charge transfer (LBCT, either intra- or inter-ligand charge transfer), or metal-based charge transfer (MBCT).

Table 3S. Selected calculated excited states for **N3** in CH<sub>3</sub>CN

| State | $E$ (eV) | $f$    | $\phi_0$ | $\phi_v$ | Character |
|-------|----------|--------|----------|----------|-----------|
| 1     | 1.2288   | 0.0358 | 113      | 114      | MLCT1     |
| 7     | 1.5826   | 0.0222 | 110      | 115      | MLCT1     |
| 8     | 1.6797   | 0.0363 | 111      | 115      | MLCT1     |
| 9     | 1.7363   | 0.0546 | 113      | 116      | MLCT1     |
| 10    | 1.8667   | 0.0759 | 113      | 117      | MLCT1     |
| 16    | 2.1033   | 0.0327 | 113      | 119      | MLCT1     |
| 18    | 2.1509   | 0.0346 | 111      | 117      | MLCT1     |
| 25    | 2.4316   | 0.0297 | 108      | 115      | MLCT1     |
| 29    | 2.6275   | 0.1956 | 107      | 114      | MLCT1     |
| 35    | 2.9789   | 0.1148 | 109      | 116      | MLCT1     |
| 37    | 3.0367   | 0.1831 | 108      | 117      | MLCT1     |
| 38    | 3.1083   | 0.0334 | 107      | 116      | MLCT1     |
| 43    | 3.2418   | 0.0267 | 108      | 118      | MLCT1     |
| 44    | 3.2603   | 0.0339 | 113      | 121      | MLCT1     |
|       |          |        | 109      | 118      | MLCT1     |
| 46    | 3.3763   | 0.0243 | 108      | 119      | MLCT1     |
|       |          |        | 107      | 119      | MLCT1     |
| 47    | 3.3945   | 0.0497 | 108      | 118      | MLCT1     |
|       |          |        | 107      | 119      | MLCT1     |
| 54    | 3.5621   | 0.0454 | 107      | 119      | MLCT1     |
| 67    | 3.7192   | 0.1990 | 112      | 124      | MBCT      |
| 68    | 3.7287   | 0.2149 | 101      | 115      | LBCT      |
| 69    | 3.7387   | 0.3887 | 102      | 115      | LBCT      |
|       |          |        | 112      | 124      | MBCT      |

Table 4S. Selected calculated excited states for deprotonated **N3** in vacuo

| State | $E$ (eV) | $f$    | $\phi_o$ | $\phi_v$ | Character |
|-------|----------|--------|----------|----------|-----------|
| 5     | 1.2899   | 0.0049 | 113      | 114      | LBCT      |
|       |          |        | 112      | 115      | LBCT      |
| 6     | 1.2912   | 0.0038 | 112      | 114      | LBCT      |
|       |          |        | 113      | 115      | LBCT      |
| 7     | 1.3403   | 0.0112 | 107      | 114      | LBCT      |
|       |          |        | 106      | 115      | LBCT      |
| 15    | 1.5307   | 0.0134 | 103      | 114      | MLCT1     |
| 22    | 1.5894   | 0.0063 | 103      | 115      | MLCT1     |
| 23    | 1.7333   | 0.0043 | 100      | 114      | LBCT      |
| 29    | 1.8146   | 0.0349 | 99       | 115      | LBCT      |
| 32    | 1.8494   | 0.0194 | 100      | 115      | LBCT      |
| 34    | 1.8713   | 0.0039 | 102      | 115      | LBCT      |
|       |          |        | 105      | 114      | MLCT1     |
| 35    | 1.9863   | 0.0067 | 98       | 114      | MLCT1     |
| 36    | 2.0124   | 0.0029 | 113      | 116      | LBCT      |
| 40    | 2.0802   | 0.0141 | 98       | 115      | MLCT1     |
| 41    | 2.0862   | 0.0045 | 106      | 117      | LBCT      |
|       |          |        | 107      | 116      | LBCT      |
| 57    | 2.3422   | 0.0124 | 103      | 116      | MLCT1     |
| 62    | 2.4088   | 0.0032 | 103      | 117      | MLCT1     |
| 71    | 2.4906   | 0.0235 | 103      | 118      | MLCT1     |
| 72    | 2.5217   | 0.0117 | 100      | 116      | LBCT      |
| 78    | 2.5965   | 0.0229 | 103      | 119      | MLCT1     |
|       |          |        | 100      | 117      | LBCT      |
| 79    | 2.6211   | 0.0057 | 100      | 117      | LBCT      |
| 80    | 2.6213   | 0.0080 | 99       | 117      | LBCT      |

Table 5S. Selected calculated excited states for deprotonated **N3** in CH<sub>3</sub>CN

| State | $E$ (eV) | $f$    | $\phi_o$ | $\phi_v$ | Character |
|-------|----------|--------|----------|----------|-----------|
| 3     | 1.6366   | 0.0169 | 105      | 114      | MLCT1     |
|       |          |        | 111      | 114      | LBCT      |
| 5     | 1.6419   | 0.0125 | 105      | 114      | MLCT1     |
|       |          |        | 111      | 114      | LBCT      |
|       |          |        | 110      | 115      | LBCT      |
| 6     | 1.6878   | 0.0097 | 105      | 115      | MLCT1     |
|       |          |        | 109      | 115      | LBCT      |
| 9     | 1.7565   | 0.0083 | 106      | 115      | LBCT      |
|       |          |        | 105      | 114      | MLCT1     |
| 17    | 1.9063   | 0.0140 | 112      | 115      | LBCT      |
|       |          |        | 113      | 114      | LBCT      |
| 19    | 1.9308   | 0.0308 | 103      | 115      | MLCT1     |
|       |          |        | 110      | 115      | LBCT      |
| 23    | 1.9454   | 0.0116 | 108      | 115      | LBCT      |
|       |          |        | 103      | 115      | MLCT1     |
| 26    | 1.9888   | 0.0289 | 104      | 115      | MLCT1     |
|       |          |        | 103      | 114      | MLCT1     |
| 36    | 2.2553   | 0.0162 | 98       | 115      | MLCT1     |
| 43    | 2.4671   | 0.0224 | 105      | 116      | MLCT1     |
|       |          |        | 109      | 116      | LBCT      |
| 46    | 2.5397   | 0.0119 | 105      | 117      | MLCT1     |
| 47    | 2.5697   | 0.0405 | 105      | 118      | MLCT1     |
| 56    | 2.6989   | 0.0376 | 105      | 119      | MLCT1     |
|       |          |        | 103      | 116      | MLCT1     |
| 59    | 2.7352   | 0.0063 | 103      | 117      | MLCT1     |
| 61    | 2.7462   | 0.0076 | 113      | 118      | LBCT      |
|       |          |        | 112      | 117      | LBCT      |
| 63    | 2.7553   | 0.0072 | 112      | 119      | LBCT      |
| 65    | 2.7709   | 0.0154 | 104      | 118      | MLCT1     |
| 73    | 2.7997   | 0.0096 | 97       | 114      | MLCT1     |
| 75    | 2.8161   | 0.0145 | 110      | 119      | LBCT      |
|       |          |        | 111      | 118      | LBCT      |

Table 6S. Selected calculated excited states for **1** in vacuo

| State  | $E$ (eV)              | $f$    | $\phi_o$          | $\phi_v$ | Character  |
|--------|-----------------------|--------|-------------------|----------|------------|
| 14     | 1.4112                | 0.0239 | 101               | 106      | MLCT1      |
|        |                       |        | 99                | 105      | MLCT1      |
| 15     | 1.4538                | 0.0372 | 101               | 106      | MLCT1      |
| 17     | 1.5009                | 0.0898 | 100               | 105      | MLCT1      |
| 29     | 2.4317                | 0.0184 | 98                | 107      | MLCT2      |
| 32     | 2.6062                | 0.0245 | 95                | 103      | MLCT2      |
| 35     | 2.7173                | 0.0543 | 96                | 105      | MLCT1      |
|        |                       |        | 96                | 104      | MLCT2      |
| 37     | 2.8083                | 0.0429 | 95                | 105      | MLCT1      |
| 41     | 2.9435                | 0.0362 | 97                | 106      | MLCT1      |
|        |                       |        | 101               | 110      | MLCT1      |
|        |                       |        | 100               | 109      | MLCT2      |
| 43     | 2.9771                | 0.0209 | 100               | 109      | MLCT2      |
| 46     | 3.0004                | 0.0194 | 101               | 110      | MLCT1      |
| 52     | 3.1951                | 0.0587 | 99                | 110      | MLCT1      |
| 53     | 3.2126                | 0.0349 | 99                | 110      | MLCT1      |
|        |                       |        | 95                | 106      | MLCT1      |
| 57     | 3.6081                | 0.0178 | 96                | 107      | MLCT2      |
|        |                       |        | 99                | 111      | MBCT       |
| 58     | 3.6301                | 0.0217 | 101               | 112      | MLCT1      |
|        |                       |        | 101               | 113      | MLCT1      |
| 59     | 3.6451                | 0.0504 | 93                | 102      | LBCT       |
|        |                       |        | 101               | 112      | MLCT2      |
| 60     | 3.6590                | 0.0438 | 101               | 113      | MLCT2      |
| 61     | 3.6815                | 0.0295 | 93                | 102      | LBCT       |
|        |                       |        | 96                | 107      | MLCT2      |
| 63     | 3.7354                | 0.1126 | 91                | 102      | LBCT       |
| 69     | 3.8349                | 0.0172 | 93                | 103      | LBCT       |
| 74     | 3.8956                | 0.0289 | 100               | 114      | MBCT       |
|        |                       |        | 99                | 113      | MLCT1      |
| 77     | 3.9491                | 0.0273 | 90                | 102      | LBCT       |
| M(NCS) | dcbpy = MLCT1; M(NCS) |        | phen = MLCT2; NCS |          | NCS = MBCT |

Table 7S. Selected calculated excited states for **1** in CH<sub>3</sub>CN

| State  | <i>E</i> (eV)          | <i>f</i>     | $\phi_0$ | $\phi_v$ | Character |
|--------|------------------------|--------------|----------|----------|-----------|
| 1      | 1.2187                 | 0.0274       | 101      | 102      | MLCT1     |
| 5      | 1.6672                 | 0.0250       | 99       | 102      | MLCT1     |
| 7      | 1.7980                 | 0.0696       | 101      | 105      | MLCT1     |
| 13     | 2.0319                 | 0.0313       | 99       | 103      | MLCT1     |
| 17     | 2.1683                 | 0.0405       | 99       | 105      | MLCT1     |
| 23     | 2.6457                 | 0.0888       | 95       | 102      | MLCT1     |
| 25     | 2.7972                 | 0.0275       | 96       | 103      | MLCT2     |
|        |                        |              | 96       | 105      | MLCT1     |
| 31     | 2.9551                 | 0.2201       | 96       | 103      | MLCT2     |
| 33     | 3.0165                 | 0.0429       | 95       | 103      | MLCT2     |
|        |                        |              | 95       | 105      | MLCT1     |
| 39     | 3.2152                 | 0.0252       | 96       | 106      | MLCT1     |
|        |                        |              | 98       | 107      | MLCT2     |
| 43     | 3.3865                 | 0.0485       | 95       | 106      | MLCT1     |
| 46     | 3.4914                 | 0.0320       | 94       | 102      | LBCT      |
| 52     | 3.6897                 | 0.0446       | 91       | 102      | LBCT      |
|        |                        |              | 90       | 102      | LBCT      |
| 54     | 3.7272                 | 0.0644       | 92       | 102      | LBCT      |
| 55     | 3.7295                 | 0.1824       | 90       | 102      | LBCT      |
|        |                        |              | 91       | 102      | LBCT      |
| 56     | 3.7329                 | 0.0667       | 100      | 111      | MBCT      |
| 57     | 3.7563                 | 0.0461       | 100      | 110      | MLCT1     |
| 65     | 3.9500                 | 0.0317       | 94       | 103      | LBCT      |
|        |                        |              | 94       | 105      | LBCT      |
| 69     | 4.0633                 | 0.0276       | 96       | 107      | MLCT2     |
| 77     | 4.1509                 | 0.0317       | 90       | 103      | LBCT      |
| M(NCS) | dc bpy = MLCT1; M(NCS) | phen = MLCT2 |          |          |           |

Table 8S. Selected calculated excited states for deprotonated **1** in vacuo

| State  | $E$ (eV)              | $f$    | $\phi_o$     | $\phi_v$ | Character |
|--------|-----------------------|--------|--------------|----------|-----------|
| 17     | 0.9661                | 0.0076 | 101          | 104      | LBCT      |
| 19     | 0.9858                | 0.0058 | 100          | 104      | LBCT      |
| 20     | 1.0242                | 0.0090 | 92           | 102      | MLCT2     |
| 28     | 1.3088                | 0.0221 | 92           | 103      | MLCT2     |
| 30     | 1.3783                | 0.0630 | 93           | 103      | MLCT2     |
| 39     | 1.8532                | 0.0062 | 95           | 104      | MLCT1     |
| 45     | 1.9895                | 0.0167 | 94           | 104      | MLCT1     |
| 50     | 2.0638                | 0.0057 | 91           | 102      | MLCT2     |
|        |                       |        | 95           | 105      | MLCT2     |
|        |                       |        | 90           | 102      | MLCT2     |
| 52     | 2.1322                | 0.0102 | 90           | 102      | MLCT2     |
| 55     | 2.2113                | 0.0062 | 90           | 103      | MLCT2     |
|        |                       |        | 94           | 105      | MLCT2     |
|        |                       |        | 89           | 103      | MLCT2     |
| 56     | 2.2311                | 0.0149 | 92           | 104      | MLCT1     |
|        |                       |        | 93           | 104      | MLCT1     |
| 58     | 2.2651                | 0.0050 | 92           | 105      | MLCT2     |
|        |                       |        | 89           | 102      | MLCT2     |
| 62     | 2.3406                | 0.0116 | 92           | 105      | MLCT2     |
| 64     | 2.6073                | 0.0953 | 89           | 103      | MLCT2     |
| 65     | 2.7226                | 0.0249 | 95           | 106      | MLCT2     |
|        |                       |        | 95           | 107      | MLCT1     |
| 67     | 2.7632                | 0.0459 | 95           | 107      | MLCT1     |
|        |                       |        | 95           | 106      | MLCT2     |
| 68     | 2.7672                | 0.0061 | 101          | 109      | LBCT      |
|        |                       |        | 100          | 109      | LBCT      |
| 72     | 2.8231                | 0.0060 | 94           | 106      | MLCT2     |
|        |                       |        | 95           | 108      | MLCT1     |
| 73     | 2.8419                | 0.0142 | 94           | 107      | MLCT1     |
|        |                       |        | 95           | 108      | MLCT1     |
| 75     | 2.8674                | 0.0102 | 88           | 102      | LBCT      |
| M(NCS) | dcbpy = MLCT1; M(NCS) |        | phen = MLCT2 |          |           |



Table 9S. Selected calculated excited states for deprotonated **1** in CH<sub>3</sub>CN

| State  | <i>E</i> (eV)         | <i>f</i> | $\phi_0$     | $\phi_v$ | Character |
|--------|-----------------------|----------|--------------|----------|-----------|
| 4      | 1.5756                | 0.0259   | 97           | 102      | LBCT      |
|        |                       |          | 97           | 103      | LBCT      |
| 21     | 1.8391                | 0.0355   | 93           | 103      | MLCT2     |
|        |                       |          | 95           | 102      | MLCT2     |
| 22     | 1.8447                | 0.0119   | 95           | 102      | MLCT2     |
| 27     | 1.9741                | 0.0269   | 94           | 104      | MLCT1     |
|        |                       |          | 92           | 102      | MLCT2     |
| 28     | 2.0223                | 0.0177   | 92           | 103      | MLCT2     |
|        |                       |          | 92           | 102      | MLCT2     |
|        |                       |          | 93           | 104      | MLCT1     |
| 29     | 2.0734                | 0.0259   | 93           | 104      | MLCT1     |
| 32     | 2.2884                | 0.0153   | 92           | 104      | MLCT1     |
| 40     | 2.6233                | 0.0123   | 100          | 105      | LBCT      |
|        |                       |          | 97           | 106      | LBCT      |
|        |                       |          | 100          | 106      | LBCT      |
| 41     | 2.6346                | 0.0258   | 97           | 106      | LBCT      |
|        |                       |          | 100          | 105      | LBCT      |
| 47     | 2.7539                | 0.0281   | 97           | 107      | LBCT      |
| 50     | 2.8165                | 0.0142   | 90           | 102      | MLCT2     |
| 53     | 2.8371                | 0.0510   | 94           | 106      | MLCT2     |
| 55     | 2.8521                | 0.0245   | 93           | 105      | MLCT2     |
| 58     | 2.9040                | 0.0473   | 90           | 103      | MLCT2     |
|        |                       |          | 89           | 102      | MLCT2     |
| 60     | 2.9282                | 0.0112   | 94           | 107      | MLCT1     |
| 62     | 2.9979                | 0.0906   | 89           | 104      | MLCT1     |
|        |                       |          | 90           | 104      | MLCT1     |
| 63     | 3.0223                | 0.0113   | 93           | 107      | MLCT1     |
| 69     | 3.2246                | 0.0311   | 92           | 107      | MLCT1     |
|        |                       |          | 89           | 104      | MLCT1     |
| 70     | 3.3756                | 0.0502   | 97           | 108      | LBCT      |
| 80     | 3.6249                | 0.0123   | 88           | 103      | LBCT      |
| M(NCS) | dcbpy = MLCT1; M(NCS) |          | phen = MLCT2 |          |           |

Table 10S. Selected calculated excited states for **2** in vacuo

| State  | $E$ (eV)              | $f$    | $\phi_o$     | $\phi_v$ | Character |
|--------|-----------------------|--------|--------------|----------|-----------|
| 7      | 0.9850                | 0.0159 | 118          | 121      | MLCT1     |
| 18     | 1.4134                | 0.0158 | 117          | 124      | MLCT1     |
|        |                       |        | 119          | 125      | MLCT1     |
| 19     | 1.4632                | 0.0402 | 119          | 125      | MLCT1     |
| 21     | 1.5048                | 0.0824 | 118          | 124      | MLCT1     |
| 28     | 2.1844                | 0.0196 | 114          | 120      | MLCT3     |
| 30     | 2.2470                | 0.0331 | 113          | 120      | MLCT3     |
| 34     | 2.4275                | 0.0362 | 113          | 121      | MLCT1     |
|        |                       |        | 115          | 124      | MLCT1     |
| 43     | 2.6948                | 0.0616 | 113          | 122      | MLCT3     |
|        |                       |        | 116          | 127      | MLCT3     |
| 44     | 2.7143                | 0.0374 | 114          | 124      | MLCT1     |
| 46     | 2.7668                | 0.1574 | 113          | 123      | MLCT3     |
| 47     | 2.8134                | 0.0410 | 118          | 128      | MLCT1     |
|        |                       |        | 113          | 124      | MLCT1     |
| 48     | 2.8325                | 0.0235 | 118          | 128      | MLCT1     |
| 50     | 2.8714                | 0.0266 | 117          | 128      | MLCT1     |
| 52     | 2.9515                | 0.0461 | 115          | 125      | MLCT1     |
| 57     | 3.0038                | 0.0219 | 119          | 130      | MLCT1     |
|        |                       |        | 119          | 131      | MLCT3     |
| 58     | 3.0410                | 0.0198 | 114          | 125      | MLCT1     |
| 61     | 3.1215                | 0.0208 | 112          | 120      | LBCT      |
|        |                       |        | 113          | 125      | MLCT1     |
|        |                       |        | 114          | 125      | MLCT1     |
| 66     | 3.1896                | 0.0187 | 117          | 131      | MLCT3     |
| 68     | 3.2311                | 0.0670 | 113          | 125      | MLCT1     |
| 80     | 3.6304                | 0.1051 | 117          | 132      | MBCT      |
| M(NCS) | dcbpy = MLCT1; M(NCS) |        | dppz = MLCT3 |          |           |

Table 11S. Selected calculated excited states for **2** in CH<sub>3</sub>CN

| State  | $E$ (eV)              | $f$                | $\phi_o$       | $\phi_v$ | Character |
|--------|-----------------------|--------------------|----------------|----------|-----------|
| 9      | 1.6356                | 0.0493             | 119            | 122      | MLCT1     |
| 11     | 1.7913                | 0.0672             | 119            | 124      | MLCT1     |
| 19     | 2.0341                | 0.0409             | 119            | 125      | MLCT1     |
| 21     | 2.1350                | 0.0345             | 117            | 124      | MLCT1     |
| 28     | 2.4374                | 0.0453             | 114            | 120      | MLCT1     |
| 29     | 2.5296                | 0.056              | 113            | 120      | MLCT3     |
| 30     | 2.6749                | 0.0762             | 113            | 121      | MLCT1     |
| 35     | 2.8769                | 0.0334             | 115            | 123      | MLCT3     |
| 40     | 2.9700                | 0.1501             | 119            | 127      | MLCT3     |
| 41     | 2.9936                | 0.1022             | 119            | 127      | MLCT3     |
| 42     | 2.9973                | 0.0559             | 112            | 120      | LBCT      |
|        |                       |                    | 119            | 127      | MLCT3     |
|        |                       |                    | 113            | 123      | MLCT3     |
| 43     | 3.0413                | 0.0537             | 112            | 120      | LBCT      |
|        |                       |                    | 113            | 122      | MLCT3     |
| 58     | 3.4500                | 0.0696             | 113            | 125      | MLCT1     |
| 74     | 3.7101                | 0.1908             | 118            | 132      | LMCT3     |
| 75     | 3.7185                | 0.3252             | 109            | 121      | LBCT      |
| 76     | 3.7608                | 0.2458             | 112            | 124      | LBCT      |
|        |                       |                    | 112            | 122      | LBCT      |
| 77     | 3.7844                | 0.1077             | 112            | 124      | LBCT      |
|        |                       |                    | 108            | 121      | LBCT      |
|        |                       |                    | 116            | 132      | MBCT      |
| 78     | 3.8001                | 0.0479             | 108            | 121      | LBCT      |
| 79     | 3.8436                | 0.4554             | 118            | 130      | MLCT1     |
| 80     | 3.8508                | 0.1218             | 118            | 130      | MLCT1     |
| M(NCS) | dcbpy = MLCT1; M(NCS) | dppz = MLCT3; dppz | (NCS)M = LMCT3 |          |           |

Table 12S. Selected calculated excited states for deprotonated **2** in vacuo

| State | $E$ (eV) | $f$    | $\phi_o$ | $\phi_v$ | Character |
|-------|----------|--------|----------|----------|-----------|
| 5     | 0.3768   | 0.0188 | 116      | 120      | MLCT3     |
| 15    | 0.9154   | 0.0070 | 116      | 121      | MLCT3     |
|       |          |        | 116      | 122      | MLCT3     |
| 18    | 1.0906   | 0.0117 | 114      | 121      | MLCT3     |
|       |          |        | 116      | 122      | MLCT3     |
|       |          |        | 112      | 122      | MLCT3     |
| 24    | 1.3561   | 0.0470 | 113      | 122      | MLCT3     |
| 26    | 1.4342   | 0.0453 | 112      | 122      | MLCT3     |
|       |          |        | 113      | 122      | MLCT3     |
| 30    | 1.5677   | 0.0214 | 118      | 123      | LBCT      |
| 31    | 1.6249   | 0.0126 | 110      | 120      | MLCT3     |
| 33    | 1.7567   | 0.0139 | 109      | 120      | MLCT3     |
|       |          |        | 108      | 120      | MLCT3     |
| 36    | 1.8381   | 0.0399 | 118      | 124      | LBCT      |
|       |          |        | 119      | 124      | LBCT      |
| 37    | 1.8445   | 0.0118 | 116      | 123      | MLCT1     |
| 41    | 1.9706   | 0.0123 | 114      | 123      | MLCT1     |
| 43    | 2.0585   | 0.0184 | 116      | 124      | MLCT3     |
| 49    | 2.1870   | 0.0110 | 113      | 123      | MLCT1     |
|       |          |        | 112      | 123      | MLCT1     |
| 50    | 2.1910   | 0.0131 | 110      | 122      | MLCT3     |
|       |          |        | 113      | 123      | MLCT1     |
| 53    | 2.2201   | 0.0137 | 116      | 125      | MLCT3     |
| 70    | 2.5442   | 0.0256 | 116      | 126      | MLCT3     |
| 73    | 2.6724   | 0.0362 | 116      | 127      | MLCT3     |
| 75    | 2.7279   | 0.2474 | 108      | 122      | MLCT3     |
|       |          |        | 118      | 128      | LBCT      |
| 76    | 2.7535   | 0.0420 | 118      | 129      | LBCT      |
| 80    | 2.8127   | 0.0105 | 112      | 126      | MLCT3     |
|       |          |        | 113      | 126      | MLCT3     |

Table 13S. Selected calculated excited states for deprotonated **2** in CH<sub>3</sub>CN

| State | $E$ (eV) | $f$    | $\phi_o$ | $\phi_v$ | Character |
|-------|----------|--------|----------|----------|-----------|
| 4     | 0.8903   | 0.0172 | 116      | 120      | MLCT3     |
| 17    | 1.5083   | 0.0409 | 116      | 121      | MLCT3     |
|       |          |        | 116      | 122      | MLCT3     |
| 24    | 1.7222   | 0.0427 | 119      | 123      | LBCT      |
| 25    | 1.7711   | 0.0571 | 113      | 122      | MLCT3     |
| 29    | 1.9235   | 0.0303 | 116      | 123      | MLCT1     |
| 30    | 1.9448   | 0.0239 | 112      | 122      | MLCT3     |
|       |          |        | 112      | 121      | MLCT3     |
| 35    | 2.1366   | 0.0202 | 114      | 123      | MLCT1     |
| 36    | 2.1968   | 0.0293 | 109      | 120      | MLCT3     |
| 43    | 2.4249   | 0.0158 | 112      | 123      | MLCT1     |
| 46    | 2.6093   | 0.0342 | 116      | 124      | MLCT3     |
|       |          |        | 110      | 122      | MLCT3     |
| 52    | 2.7278   | 0.0156 | 116      | 125      | MLCT3     |
| 56    | 2.7798   | 0.0311 | 109      | 121      | MLCT3     |
|       |          |        | 108      | 121      | MLCT3     |
| 61    | 2.8884   | 0.4117 | 119      | 127      | LBCT      |
| 65    | 2.9503   | 0.0177 | 114      | 125      | MLCT3     |
| 67    | 2.9698   | 0.0216 | 116      | 127      | MLCT3     |
|       |          |        | 113      | 125      | MLCT3     |
| 68    | 2.9763   | 0.0171 | 116      | 127      | MLCT3     |
|       |          |        | 113      | 125      | MLCT3     |
| 69    | 2.9977   | 0.0359 | 106      | 120      | LBCT      |
| 70    | 3.0155   | 0.0142 | 113      | 126      | MLCT3     |
| 74    | 3.0795   | 0.0422 | 113      | 126      | MLCT3     |
| 75    | 3.0983   | 0.0374 | 110      | 123      | MLCT1     |
